# Supplementary material for: Cellular and Humoral Immunity after the Third Vaccination against SARS-CoV-2 in Hematopoietic Stem-Cell Transplant Recipients
Source: MDPI journal article supplement (doi:10.3390/vaccines10060972), 2022-06-18
Supplement: s1 [file s1]

**Table S1.** Spearman analysis of cellular immune response in hematopoietic stem cell transplant (HSCT) patients before and after the third vaccination. In each case, spots increment upon stimulation with SARS-CoV-2 proteins/peptide mixtures was correlated with the age of the volunteers.

| Antigens tested in <i>in house</i> ELISpot vs. age HSCT patients | Correlation coefficient <i>r</i> before third vaccination | <i>p</i> -value before third vaccination | Correlation coefficient <i>r</i> after third vaccination | <i>p</i> -value after third vaccination |
|------------------------------------------------------------------|-----------------------------------------------------------|------------------------------------------|----------------------------------------------------------|-----------------------------------------|
| S1/S2 IFN- $\gamma$                                              | -0.4                                                      | 0.08                                     | -0.4                                                     | 0.1                                     |
| S1 IFN- $\gamma$                                                 | -0.2                                                      | 0.4                                      | -0.4                                                     | 0.09                                    |
| S1 Sino IFN- $\gamma$                                            | -0.1                                                      | 0.5                                      | -0.5                                                     | 0.03                                    |
| S1/S2 IL-2                                                       | -0.2                                                      | 0.4                                      | -0.3                                                     | 0.2                                     |
| S1 IL-2                                                          | -0.2                                                      | 0.5                                      | -0.3                                                     | 0.2                                     |
| S1 Sino IL-2                                                     | 0.03                                                      | 0.9                                      | -0.4                                                     | 0.1                                     |
| S-Pool IFN- $\gamma$                                             | -0.2                                                      | 0.6                                      | -0.4                                                     | 0.2                                     |
| S-Pool IL-2                                                      | -0.3                                                      | 0.3                                      | -0.7                                                     | 0.008                                   |
| S-Pool IFN- $\gamma$ and IL-2                                    | -0.2                                                      | 0.5                                      | -0.6                                                     | 0.03                                    |

**Table S2.** Spearman analysis of cellular immune response in healthy controls before and after the third vaccination. In each case, spots increment upon stimulation with SARS-CoV-2 proteins/peptide mixtures correlated with the age of the volunteers.

| Antigens tested in <i>in house</i> ELISpot vs. age healthy controls | Correlation coefficient <i>r</i> before third vaccination | <i>p</i> -value before third vaccination | Correlation coefficient <i>r</i> after third vaccination | <i>p</i> -value after third vaccination |
|---------------------------------------------------------------------|-----------------------------------------------------------|------------------------------------------|----------------------------------------------------------|-----------------------------------------|
| S1/S2 IFN- $\gamma$                                                 | -0.4                                                      | 0.1                                      | -0.8                                                     | <0.0001                                 |
| S1 IFN- $\gamma$                                                    | -0.3                                                      | 0.2                                      | -0.6                                                     | 0.01                                    |
| S1 Sino IFN- $\gamma$                                               | 0.2                                                       | 0.4                                      | -0.4                                                     | 0.05                                    |
| S1/S2 IL-2                                                          | -0.5                                                      | 0.1                                      | -0.3                                                     | 0.2                                     |
| S1 IL-2                                                             | -0.4                                                      | 0.2                                      | -0.3                                                     | 0.2                                     |
| S1 Sino IL-2                                                        | -0.8                                                      | 0.1                                      | -0.1                                                     | 0.7                                     |
| S-Pool IFN- $\gamma$                                                | 0.2                                                       | 0.6                                      | -0.2                                                     | 0.4                                     |
| S-Pool IL-2                                                         | -0.5                                                      | 0.2                                      | -0.4                                                     | 0.1                                     |
| S-Pool IFN- $\gamma$ and IL-2                                       | -0.01                                                     | 0.9                                      | -0.4                                                     | 0.09                                    |

**Table S3.** Spearman analysis of humoral immune response in hematopoietic stem cell transplant (HSCT) patients before and after the third vaccination. In each case, antibody ratio, antibody concentration and titer of neutralizing antibodies were correlated with the age of the volunteers.

| Antibodies tested vs. age HSCT patients | Correlation coefficient <i>r</i> before third vaccination | <i>p</i> -value before third vaccination | Correlation coefficient <i>r</i> after third vaccination | <i>p</i> -value after third vaccination |
|-----------------------------------------|-----------------------------------------------------------|------------------------------------------|----------------------------------------------------------|-----------------------------------------|
| Antibody ratio                          | -0.05                                                     | 0.8                                      | -0.08                                                    | 0.8                                     |
| Antibody concentration [BAU/ml]         | 0.01                                                      | 0.9                                      | -0.02                                                    | 0.9                                     |
| 1/Neutralizing Titer                    | 0.02                                                      | 0.9                                      | -0.5                                                     | 0.06                                    |

**Table S4.** Spearman analysis of humoral immune response in healthy controls before and after the third vaccination. In each case, antibody ratio, antibody concentration and titer of neutralizing antibodies were correlated with the age of the volunteers.

| Antibodies tested vs. age healthy controls | Correlation coefficient $r$ before third vaccination | $p$ -value before third vaccination | Correlation coefficient $r$ after third vaccination | $p$ -value after third vaccination |
|--------------------------------------------|------------------------------------------------------|-------------------------------------|-----------------------------------------------------|------------------------------------|
| Antibody ratio $\gamma$                    | 0.002                                                | 0.9                                 | -0.3                                                | 0.2                                |
| Antibody concentration [BAU/ml]            | 0.1                                                  | 0.7                                 | -0.4                                                | 0.08                               |
| 1/Neutralizing Titer                       | -0.08                                                | 0.8                                 | -0.4                                                | 0.05                               |

**Table S5.** Spearman analysis of spots increment in hematopoietic stem cell transplant (HSCT) patients before and after the third vaccination. In each case, spots increment upon stimulation with SARS-CoV-2 proteins/peptide mixtures was correlated with the interval between HSCT and blood collection.

| Interval between HSCT and blood collection vs. spots increment in HSCT patients | Correlation coefficient $r$ before third vaccination | $p$ -value before third vaccination | Correlation coefficient $r$ after third vaccination | $p$ -value after third vaccination |
|---------------------------------------------------------------------------------|------------------------------------------------------|-------------------------------------|-----------------------------------------------------|------------------------------------|
| S1/S2 IFN- $\gamma$                                                             | 0.2                                                  | 0.4                                 | -0.2                                                | 0.4                                |
| S1 IFN- $\gamma$                                                                | 0.1                                                  | 0.5                                 | -0.3                                                | 0.2                                |
| S1 Sino IFN- $\gamma$                                                           | -0.1                                                 | 0.6                                 | -0.5                                                | 0.03                               |
| S1/S2 IL-2                                                                      | -0.04                                                | 0.9                                 | -0.2                                                | 0.5                                |
| S1 IL-2                                                                         | -0.1                                                 | 0.6                                 | -0.03                                               | 0.9                                |
| S1 Sino IL-2                                                                    | -0.07                                                | 0.8                                 | -0.2                                                | 0.4                                |
| S-Pool IFN- $\gamma$                                                            | -0.08                                                | 0.8                                 | -0.2                                                | 0.5                                |
| S-Pool IL-2                                                                     | 0.07                                                 | 0.9                                 | -0.1                                                | 0.6                                |
| S-Pool IFN- $\gamma$ and IL-2                                                   | -0.1                                                 | 0.7                                 | -0.2                                                | 0.5                                |

**Table S6.** Spearman analysis of antibodies tested in hematopoietic stem cell transplant (HSCT) patients before and after the third vaccination. In each case, antibody ratio, antibody concentration and titer of neutralizing antibodies were correlated with the interval between HSCT and blood collection.

| Interval between HSCT and blood collection vs. Antibodies tested in HSCT patients | Correlation coefficient $r$ before third vaccination | $p$ -value before third vaccination | Correlation coefficient $r$ after third vaccination | $p$ -value after third vaccination |
|-----------------------------------------------------------------------------------|------------------------------------------------------|-------------------------------------|-----------------------------------------------------|------------------------------------|
| Antibody ratio $\gamma$                                                           | 0.02                                                 | 0.9                                 | -0.1                                                | 0.6                                |
| Antibody concentration [BAU/ml]                                                   | 0.04                                                 | 0.9                                 | -0.4                                                | 0.1                                |
| 1/Neutralizing Titer                                                              | 0.1                                                  | 0.6                                 | -0.1                                                | 0.6                                |

**Table S7.** *P*-values of two-tailed Mann-Whitney tests comparing the results of HSCT patients and healthy controls before and after third vaccination.

| Antigens tested in CoV-iSpot  | HSCT pts.<br>vs.<br>controls<br>before third vaccination | HSCT pts.<br>vs.<br>controls<br>after third vaccination |
|-------------------------------|----------------------------------------------------------|---------------------------------------------------------|
| S-Pool (IFN- $\gamma$ )       | 0.8                                                      | 0.4                                                     |
| S-Pool (IL-2)                 | 0.1                                                      | 0.007                                                   |
| S-Pool (IFN- $\gamma$ + IL-2) | 0.6                                                      | 0.02                                                    |

**Table S8.** *P*-values of two-tailed Mann-Whitney tests comparing the results for IFN- $\gamma$  of HSCT patients and healthy controls before and after third vaccination.

| Antigens tested in<br><i>in house</i> IFN- $\gamma$<br>ELISpot | HSCT pts.<br>vs.<br>controls<br>before third vaccination | HSCT pts.<br>vs.<br>controls<br>after third vaccination |
|----------------------------------------------------------------|----------------------------------------------------------|---------------------------------------------------------|
| S1/S2                                                          | 0.07                                                     | 0.08                                                    |
| S1                                                             | 0.01                                                     | 0.006                                                   |
| S1 Sino                                                        | 0.1                                                      | 0.001                                                   |

**Table S9.** *P*-values of two-tailed Mann-Whitney tests comparing the results for IL-2 of HSCT patients and healthy controls before and after third vaccination.

| Antigens tested in<br><i>in house</i> IL-2<br>ELISpot | HSCT pts.<br>vs.<br>controls<br>before third vaccination | HSCT pts.<br>vs.<br>controls<br>after third vaccination |
|-------------------------------------------------------|----------------------------------------------------------|---------------------------------------------------------|
| S1/S2                                                 | 0.1                                                      | 0.0005                                                  |
| S1                                                    | 0.04                                                     | 0.01                                                    |
| S1 Sino                                               | 0.02                                                     | 0.02                                                    |

**Table S10.** *P*-values of two-tailed Mann-Whitney tests comparing the results of HSCT patients and healthy controls before and after third vaccination.

| Mutations/variants<br>tested in neutralization<br>antibody assay | HSCT pts.<br>vs.<br>controls<br>before third vaccination | HSCT pts.<br>vs.<br>controls<br>after third vaccination |
|------------------------------------------------------------------|----------------------------------------------------------|---------------------------------------------------------|
| Wild type S1                                                     | 0.4                                                      | 0.002                                                   |
| Wild type RBD                                                    | 0.5                                                      | 0.002                                                   |
| Alpha S1                                                         | 0.6                                                      | 0.0008                                                  |
| Beta S1                                                          | 0.5                                                      | 0.0008                                                  |
| Gamma RBD                                                        | 0.7                                                      | 0.0008                                                  |
| E484K RBD                                                        | 0.4                                                      | 0.0008                                                  |
| Epsilon RBD                                                      | 0.5                                                      | 0.0008                                                  |
| Kappa RBD                                                        | 0.5                                                      | 0.0008                                                  |
| D614G S1                                                         | 0.5                                                      | 0.002                                                   |
| K417N RBD                                                        | 0.5                                                      | 0.002                                                   |
| N501Y RBD                                                        | 0.4                                                      | 0.0008                                                  |

**Table S11.** *P*-values of two-tailed Mann-Whitney tests comparing the results of HSCT patients and healthy controls before and after third vaccination.

| Antibody ELISA | HSCT pts.<br>vs.<br>controls<br>before third vaccination | HSCT pts.<br>vs.<br>controls<br>after third vaccination |
|----------------|----------------------------------------------------------|---------------------------------------------------------|
| Antibody Ratio | 0.6                                                      | 0.002                                                   |
| BAU/ml         | 0.5                                                      | 0.2                                                     |
